# Supplementary material for: Changing geographical patterns and trends in cancer incidence in children and adolescents in Europe, 1991–2010 (Automated Childhood Cancer Information System): a population-based study
Source: PubMed Central journal article supplement (PMC6120055; doi:10.1016/s1470-2045(18)30423-6), 2018-09
Supplement: mmc1.pdf [file mmc1.pdf]

# THE LANCET Oncology

## Supplementary appendix

This appendix formed part of the original submission and has been peer reviewed. We post it as supplied by the authors.

Supplement to: Steliarova-Foucher E, Fidler M M, Colombet M, et al. Changing geographical patterns and trends in cancer incidence in children and adolescents in Europe, 1991–2010 (Automated Childhood Cancer Information System): a population-based study. *Lancet Oncol* 2018; published online Aug 8. [http://dx.doi.org/10.1016/S1470-2045\(18\)30423-6](http://dx.doi.org/10.1016/S1470-2045(18)30423-6).

# Changing geographical patterns and trends in cancer incidence in children and adolescents in Europe, 1991-2010 (Automated Childhood Cancer Information System): a population-based study

## ACCIS contributors

Austria: M Hackl (Austrian National Cancer Registry); Belarus: A Zborovskaya (Childhood Cancer SubRegistry of Belarus); Bulgaria: N Dimitrova, Z Valerianova (Bulgarian National Cancer Registry); Czech Republic: M Dušek (Czech National Cancer Registry); Estonia: M Mägi (Estonian Cancer Registry); France: A Monnereau (French Cancer Incidence and Mortality Network (FRANCIM)); J Clavel (National Registry of Childhood Haematological Malignancies); M Velten (Bas-Rhin Cancer Registry); AV Guizard (Calvados General Cancer Registry); V Bouvier (Calvados Registry of Digestive Tumours); X Troussard (Lower Normandy Hemopathy Registry); AS Woronoff (Doubs Cancer Registry); E Marrer (Haut-Rhin Cancer Registry); B Tretarre (Hérault Cancer Registry); M Colonna (Isère Cancer Registry); O Ganry (Somme Cancer Registry); P Grosclaude (Tarn Cancer Registry); Germany: P Kaatsch (German Childhood Cancer Registry (GCCR)); B Hollecsek (Saarland Cancer Registry); Hungary: Z Jakab (Hungarian Childhood Cancer Registry); Iceland: L Tryggvadóttir (Icelandic Cancer Registry); Italy: L Mangone (Italian Association of Cancer Registries (AIRTUM)); F Merletti (Childhood Cancer Registry of Piedmont); S Ferretti (Ferrara Province Cancer Registry); B Caruso (Tumour Registry of Modena); M Michiara (Parma Cancer Registry); R Tumino (Ragusa Cancer Registry); F Falcini (Romagna Cancer Registry); R Zanetti (Piedmont Cancer Registry, city of Turin); G Tagliabue (Lombardy Cancer Registry, Varese Province); Netherlands: O Visser (Netherlands Cancer Registry); Norway: G Ursin (Cancer Registry of Norway); Poland: R Mężyk (Kielce Cancer Registry); K Kepska (Lower Silesia Cancer Registry); Portugal: J Laranja Pontes (Portugal North Region Cancer Registry); Slovenia: M Primic Žakelj (Cancer Registry of Republic of Slovenia); Spain: R Fernández-Delgado (Spanish Registry of Childhood Tumours (RETI-SEHOP), UVEG); ML Vicente Raneda (Comunitat Valenciana Childhood Cancer Registry); E Almar Marqués (Albacete Cancer Registry, Castile-La Mancha); JR Quirós García (Asturias Cancer Registry); A Lopez de Munain (Basque Country Cancer Registry); R Marcos-Gragera (Girona Cancer Registry); MJ Sanchez-Perez (Granada Cancer Registry, CIBERESP); M Ramos Monserrat (Mallorca Cancer Registry); E Ardanaz (Navarra Cancer Registry, CIBERESP); J Galceran (Tarragona Cancer Registry); Sweden: S Khan (Swedish Cancer Registry); Switzerland: CE Kuehni (Swiss Childhood Cancer Registry); C Bouchardy (Geneva Cancer Registry); F Levi (Neuchâtel Cancer Registry and Vaud Cancer Registry); I Konzelmann (Valais Cancer Registry); S Rohrmann (Cancer Registry Zurich and Zug); UK: CA Stiller (National Registry of Childhood Tumours); S Vernon (Public Health England); DH Brewster (Scottish Cancer Registry); C White (Welsh Cancer Registry); International Agency for Research on Cancer: M Colombet, A Dolya, E Steliarova-Foucher.

## Changing geographical patterns and trends in cancer incidence in children and adolescents in Europe, 1991-2010 (Automated Childhood Cancer Information System): a population-based study

**Table S-1. Overview of the datasets provided by the contributing population-based cancer registries.**

Person-years and numbers of cases refer to age 0-19 (general cancer registries and Belarus) and age 0-14 (the other paediatric registries). DCO, death certificate only; HM, haematological malignancies; NOS, unspecified cases; MV, microscopic verification; Unkn., unknown. <sup>1</sup>Includes non-malignant tumours, pilocytic astrocytoma, myelodysplasia, skin cancer, and carcinoid of appendix.

| Registry                            | Region | Contributing to analyses |          |       | Person-years | Total cases<br>(A) | Excluded <sup>1</sup><br>(% A) | Included<br>cases<br>(B) | Basis of diagnosis<br>(% B) |      |       | NOS<br>(% B) |
|-------------------------------------|--------|--------------------------|----------|-------|--------------|--------------------|--------------------------------|--------------------------|-----------------------------|------|-------|--------------|
|                                     |        | 0-14                     | 0-14, HM | 15-19 |              |                    |                                |                          | DCO                         | MV   | Unkn. |              |
| BELARUS, paediatric                 | East   | +                        | +        | +     | 51 608 997   | 8 477              | 5.2                            | 8 035                    | 0.1                         | 97.2 | 0.0   | 4.1          |
| BULGARIA                            | East   | +                        | +        | +     | 36 628 541   | 4 476              | 2.0                            | 4 386                    | 6.0                         | 90.3 | 0.0   | 12.1         |
| CZECH REPUBLIC                      | East   | +                        | +        | +     | 49 098 564   | 8 306              | 6.9                            | 7 732                    | 1.6                         | 92.9 | 0.0   | 7.7          |
| HUNGARY, paediatric                 | East   | +                        | +        |       | 34 416 963   | 4 756              | 8.2                            | 4 368                    | —                           | 97.5 | 0.0   | 0.7          |
| POLAND, Kielce                      | East   | +                        | +        | +     | 6 570 051    | 909                | 1.4                            | 896                      | 0.0                         | 91.7 | 0.6   | 13.1         |
| POLAND, Lower Silesia               | East   | +                        | +        | +     | 14 973 285   | 1 971              | 3.7                            | 1 898                    | 0.0                         | 88.1 | 0.0   | 16.5         |
| ESTONIA                             | North  | +                        | +        | +     | 7 026 036    | 1 103              | 9.2                            | 1 001                    | 0.5                         | 96.7 | 0.0   | 4.6          |
| ICELAND                             | North  | +                        | +        | +     | 1 744 021    | 314                | 11.1                           | 279                      | 0.0                         | 94.6 | 0.0   | 6.5          |
| NORWAY                              | North  | +                        | +        | +     | 23 361 679   | 4 185              | 15.5                           | 3 537                    | 0.1                         | 96.5 | 0.0   | 3.2          |
| SWEDEN                              | North  | +                        | +        | +     | 43 152 649   | 6 899              | 9.4                            | 6 250                    | —                           | 97.5 | 0.0   | 5.8          |
| UK, England and Wales, paediatric   | North  | +                        | +        |       | 196 350 418  | 27 799             | 11.7                           | 24 543                   | 0.3                         | 92.3 | 1.8   | 1.7          |
| UK, England                         | North  |                          |          | +     | 247 079 350  | 34 873             | 5.4                            | 33 004                   | 0.3                         | 91.2 | 2.7   | 4.2          |
| UK, Scotland                        | North  | +                        | +        | +     | 24 640 383   | 3 890              | 12.3                           | 3 411                    | 0.2                         | 95.6 | 1.6   | 2.8          |
| UK, Wales                           | North  |                          |          | +     | 14 634 780   | 2 263              | 11.0                           | 2 014                    | 0.8                         | 76.0 | 18.1  | 6.3          |
| ITALY, Piedmont, paediatric         | South  | +                        | +        |       | 10 619 168   | 1 997              | 12.8                           | 1 741                    | 0.1                         | 97.0 | 0.0   | 1.8          |
| ITALY, Ferrara                      | South  | +                        | +        | +     | 982 434      | 231                | 8.2                            | 212                      | 0.9                         | 85.4 | 0.0   | 12.7         |
| ITALY, Modena                       | South  | +                        | +        | +     | 2 211 491    | 436                | 6.2                            | 409                      | 0.5                         | 96.3 | 0.0   | 2.4          |
| ITALY, Parma                        | South  | +                        | +        | +     | 1 292 841    | 286                | 8.7                            | 261                      | 0.0                         | 96.9 | 0.0   | 6.1          |
| ITALY, Ragusa                       | South  | +                        | +        | +     | 1 672 408    | 332                | 12.7                           | 290                      | 0.0                         | 93.8 | 0.0   | 7.9          |
| ITALY, Romagna                      | South  | +                        | +        | +     | 3 421 112    | 697                | 12.9                           | 607                      | 0.3                         | 91.4 | 0.0   | 8.7          |
| ITALY, Turin                        | South  |                          |          | +     | 2 850 497    | 511                | 0.4                            | 509                      | 0.2                         | 96.1 | 0.4   | 4.9          |
| ITALY, Varese                       | South  | +                        | +        | +     | 3 098 091    | 629                | 6.4                            | 589                      | 0.2                         | 96.8 | 0.0   | 1.7          |
| PORTUGAL, North                     | South  | +                        | +        | +     | 16 009 471   | 2 575              | 8.4                            | 2 358                    | —                           | 98.0 | 0.5   | 4.2          |
| SLOVENIA                            | South  | +                        | +        | +     | 9 125 219    | 1 411              | 7.5                            | 1 305                    | 0.0                         | 99.2 | 0.0   | 2.0          |
| SPAIN, Selected regions, paediatric | South  | +                        | +        |       | 39 566 669   | 5 892              | 6.9                            | 5 487                    | —                           | 92.9 | 0.1   | 1.8          |
| SPAIN, Valencia, paediatric         | South  | +                        | +        |       | 13 540 211   | 2 204              | 7.2                            | 2 046                    | 0.0                         | 94.9 | 0.0   | 1.8          |
| SPAIN, Albacete                     | South  | +                        | +        | +     | 1 752 522    | 286                | 5.9                            | 269                      | 0.4                         | 96.3 | 0.0   | 3.0          |
| SPAIN, Asturias                     | South  | +                        | +        | +     | 3 708 214    | 599                | 4.8                            | 570                      | 0.2                         | 96.7 | 0.0   | 4.4          |
| SPAIN, Basque Country               | South  |                          |          | +     | 8 073 240    | 1 520              | 8.6                            | 1 390                    | 0.6                         | 95.8 | 0.0   | 6.4          |
| SPAIN, Girona                       | South  |                          |          | +     | 2 567 924    | 475                | 9.9                            | 428                      | 0.5                         | 97.0 | 0.5   | 1.9          |
| SPAIN, Granada                      | South  | +                        | +        | +     | 4 262 321    | 689                | 8.6                            | 630                      | 0.3                         | 95.9 | 0.0   | 3.7          |
| SPAIN, Mallorca                     | South  | +                        | +        | +     | 3 142 488    | 533                | 7.9                            | 491                      | 0.0                         | 95.7 | 0.8   | 2.6          |
| SPAIN, Navarra                      | South  |                          |          | +     | 2 308 507    | 459                | 8.9                            | 418                      | 1.0                         | 95.9 | 0.0   | 2.9          |
| SPAIN, Tarragona                    | South  |                          |          | +     | 2 779 386    | 517                | 6.6                            | 483                      | 0.4                         | 96.3 | 0.0   | 2.3          |
| AUSTRIA                             | West   | +                        | +        | +     | 36 609 850   | 5 886              | 5.0                            | 5 593                    | 1.6                         | 97.4 | 0.4   | 5.1          |
| FRANCE, paediatric, HM              | West   |                          | +        |       | 225 636 031  | 13 306             | 1.0                            | 13 178                   | —                           | 97.9 | 0.0   | 1.3          |
| FRANCE, Bas-Rhin                    | West   | +                        |          | +     | 5 290 643    | 909                | 8.8                            | 829                      | —                           | 95.8 | 0.0   | 3.1          |
| FRANCE, Calvados                    | West   | +                        |          | +     | 3 490 024    | 556                | 7.9                            | 512                      | —                           | 97.9 | 0.0   | 3.3          |
| FRANCE, Doubs                       | West   | +                        |          | +     | 2 699 695    | 451                | 7.8                            | 416                      | —                           | 97.6 | 0.0   | 3.6          |
| FRANCE, Haut-Rhin                   | West   | +                        |          | +     | 3 696 586    | 603                | 7.8                            | 556                      | —                           | 98.6 | 0.0   | 3.2          |
| FRANCE, Hérault                     | West   | +                        |          | +     | 4 500 673    | 785                | 6.8                            | 732                      | —                           | 96.9 | 0.0   | 1.4          |
| FRANCE, Isère                       | West   | +                        |          | +     | 6 040 465    | 1 074              | 8.6                            | 982                      | —                           | 96.9 | 0.1   | 1.6          |
| FRANCE, Somme                       | West   | +                        |          | +     | 2 971 919    | 416                | 2.2                            | 407                      | —                           | 95.6 | 0.0   | 2.0          |
| FRANCE, Tam                         | West   | +                        |          | +     | 1 613 625    | 256                | 11.7                           | 226                      | —                           | 97.3 | 0.0   | 2.2          |
| GERMANY, paediatric                 | West   | +                        | +        |       | 248 679 583  | 36 006             | 10.2                           | 32 324                   | —                           | 96.6 | 0.0   | 0.8          |
| GERMANY, Saarland                   | West   |                          |          | +     | 4 145 262    | 714                | 9.7                            | 645                      | 1.1                         | 95.7 | 0.0   | 12.1         |
| THE NETHERLANDS                     | West   | +                        | +        | +     | 77 479 099   | 12 797             | 10.7                           | 11 423                   | —                           | 97.1 | 0.0   | 1.9          |
| SWITZERLAND, paediatric             | West   | +                        | +        |       | 24 300 913   | 3 696              | 10.5                           | 3 309                    | 0.2                         | 93.5 | 0.9   | 1.5          |
| SWITZERLAND, Geneva                 | West   |                          |          | +     | 1 817 468    | 305                | 11.1                           | 271                      | 0.0                         | 96.7 | 0.0   | 1.1          |
| SWITZERLAND, Neuchâtel              | West   |                          |          | +     | 761 176      | 152                | 9.2                            | 138                      | 0.7                         | 98.6 | 0.0   | 1.4          |
| SWITZERLAND, Valais                 | West   |                          |          | +     | 1 332 868    | 214                | 11.7                           | 189                      | 0.5                         | 97.9 | 0.0   | 2.6          |
| SWITZERLAND, Vaud                   | West   |                          |          | +     | 2 910 584    | 489                | 9.4                            | 443                      | 0.7                         | 98.4 | 0.0   | 2.9          |
| SWITZERLAND, Zurich                 | West   |                          |          | +     | 5 074 230    | 972                | 10.1                           | 874                      | 0.2                         | 98.2 | 0.0   | 3.5          |

## Changing geographical patterns and trends in cancer incidence in children and adolescents in Europe, 1991-2010 (Automated Childhood Cancer Information System): a population-based study

**Table S-2. Overview of the data available for analyses. Europe, 1991-2010.**

CNS, central nervous system; DCO, death certificate only; MV, microscopically verified; N<sub>0</sub>, total number available in the selected registries over the defined study period; N number of cases included in various analyses; NOS, unspecified histology; PA, pilocytic astrocytoma of any behaviour; Unkn., unknown.

<sup>1</sup>UN population estimates for Europe and the regions in 2010 [Reference], the year used for calculation of coverage.

<sup>2</sup>The percentage was calculated by comparing the average annual population in the areas covered by the participating registries (numerator) and the UN estimates of the total population in the four European regions and the two age groups (denominator).

<sup>3</sup>The percentage relates to the total numbers of cases, N<sub>0</sub>.

<sup>4</sup>The percentage relates to the included numbers of cases, N.

<sup>5</sup>Only the areas with access to death certificates were included in the calculation of the percentage.

<sup>6</sup>Population data for 2010 (the denominator) include Cyprus

<sup>7</sup>The person-years shown are those included in the analyses of haematopoietic malignancies; the person-years included in the analyses of all cancers and the CNS tumours was 380 456 382. N includes all 13 178 haematopoietic malignancies (HM) from the French national paediatric registry and the 1723 cases classified into other diagnostic groups from the French general cancer registries, but excludes 1408 HM registered in the general cancer registries.

| Age and Region         | Year 2010                             |                            | Person-years included | Cases                   |                                     |                      |                |                          |               |         | Basis of diagnosis <sup>4</sup> |            |          |     |
|------------------------|---------------------------------------|----------------------------|-----------------------|-------------------------|-------------------------------------|----------------------|----------------|--------------------------|---------------|---------|---------------------------------|------------|----------|-----|
|                        | Population <sup>1</sup><br>(millions) | Coverage <sup>2</sup><br>% |                       | Total<br>N <sub>0</sub> | Excluded <sup>3</sup>               |                      |                |                          | Included<br>N | MV<br>% | DCO <sup>5</sup><br>%           | Unkn.<br>% | NOS<br>% |     |
|                        |                                       |                            |                       |                         | Non-malignant CNS<br>tumours and PA | Myelo-<br>dysplasias | Skin<br>cancer | Carcinoid<br>of appendix |               |         |                                 |            |          |     |
| <b>Age 0-14 years</b>  |                                       |                            |                       |                         |                                     |                      |                |                          |               |         |                                 |            |          |     |
| East                   | 43.7                                  | 13.7                       | 145 896 608           | 20 483                  | 5.9                                 | 1 019                | 65             | 105                      | 20            | 19 274  | 93.9                            | 1.9        | 0.0      | 6.8 |
| North                  | 17.5                                  | 76.9                       | 270 670 172           | 38 954                  | 11.8                                | 4 130                | 227            | 225                      | 33            | 34 339  | 93.4                            | 0.3        | 1.4      | 2.5 |
| South <sup>6</sup>     | 23.0                                  | 25.5                       | 99 832 251            | 15 745                  | 8.2                                 | 1 203                | 32             | 47                       | 13            | 14 450  | 94.7                            | 0.1        | 0.1      | 2.7 |
| West <sup>7</sup>      | 29.9                                  | 93.3                       | 583 782 306           | 67 516                  | 8.2                                 | 4 720                | 642            | 50                       | 132           | 61 972  | 96.6                            | 1.0        | 0.1      | 1.4 |
| Europe <sup>6</sup>    | 114.1                                 | 46.6                       | 1 100 181 337         | 142 698                 | 8.9                                 | 11 072               | 966            | 427                      | 198           | 130 035 | 95.2                            | 0.8        | 0.4      | 2.6 |
| <b>Age 15-19 years</b> |                                       |                            |                       |                         |                                     |                      |                |                          |               |         |                                 |            |          |     |
| East                   | 18.2                                  | 10.2                       | 47 399 793            | 8 412                   | 4.4                                 | 134                  | 26             | 180                      | 31            | 8 041   | 94.6                            | 1.5        | 0.0      | 7.6 |
| North                  | 6.4                                   | 76.9                       | 90 971 926            | 16 231                  | 6.3                                 | 747                  | 12             | 178                      | 87            | 15 207  | 93.1                            | 0.4        | 2.5      | 5.4 |
| South <sup>6</sup>     | 8.0                                   | 10.7                       | 20 009 028            | 4 271                   | 7.7                                 | 212                  | 9              | 102                      | 7             | 3 941   | 98.0                            | 0.3        | 0.2      | 3.8 |
| West <sup>7</sup>      | 10.6                                  | 20.1                       | 41 048 267            | 8 723                   | 8.9                                 | 474                  | 40             | 41                       | 219           | 7 949   | 98.7                            | 1.1        | 0.1      | 3.0 |
| Europe <sup>6</sup>    | 43.2                                  | 22.6                       | 199 429 014           | 37 637                  | 6.6                                 | 1 567                | 87             | 501                      | 344           | 35 138  | 95.3                            | 0.8        | 1.1      | 5.2 |

Reference:

UN Department of Economic and Social Affairs, Population Division. World Population Prospects 2017. <https://esa.un.org/unpd/wpp/> (accessed Feb 21, 2018)

Figure S-1. Incidence trends of leukaemia, lymphoma, malignant CNS tumours and other cancers in children aged 0-14 years, by region. Europe, 1991-2010.

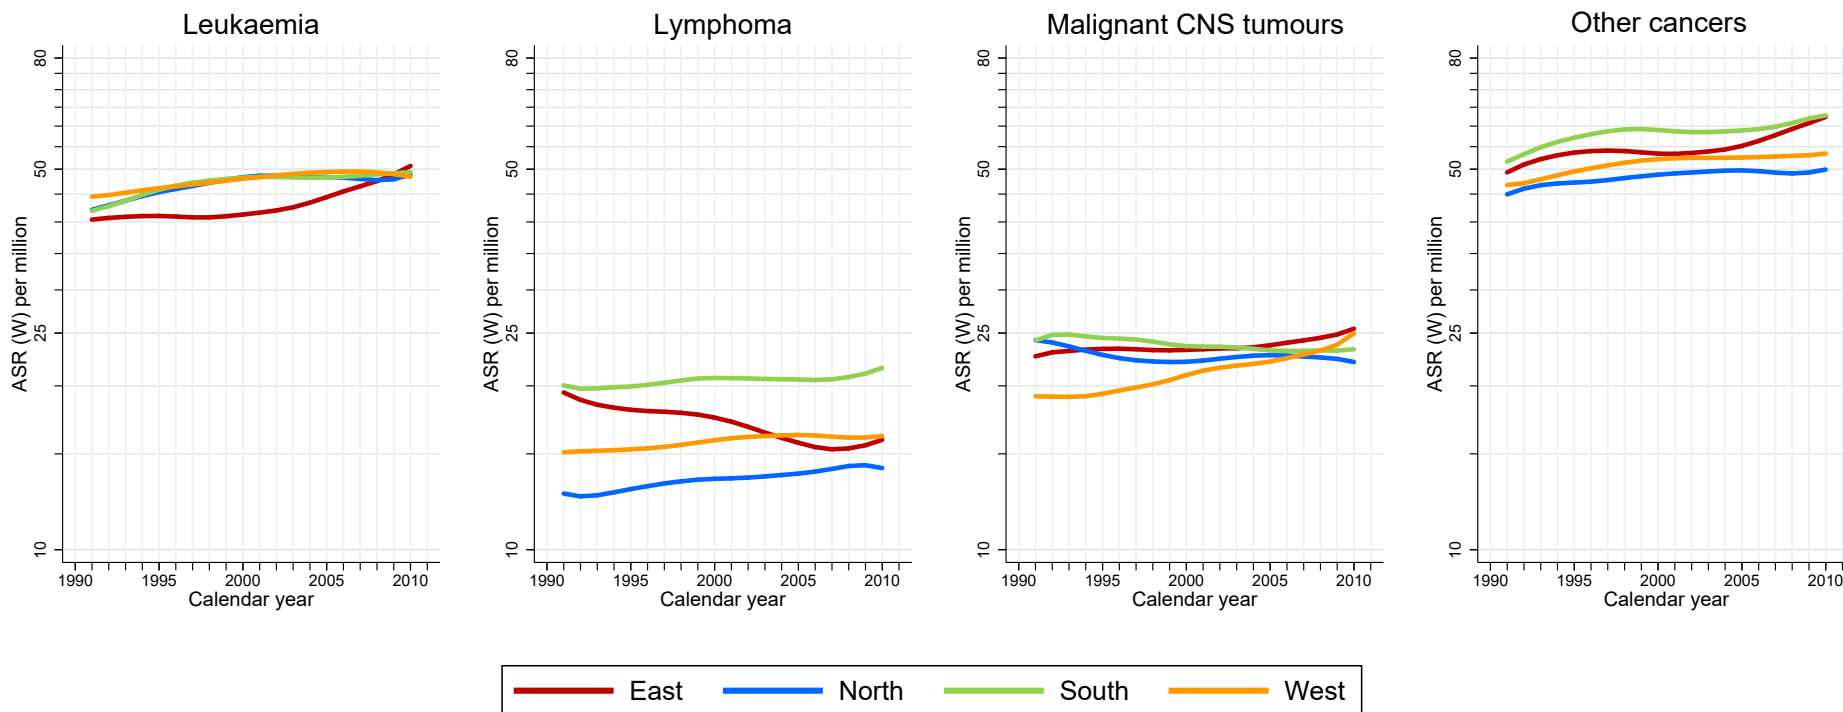

Figure S-2. Incidence trends of leukaemia, lymphoma, malignant CNS tumours and other cancers in adolescents aged 15-19 years, by region. Europe, 1991-2010.

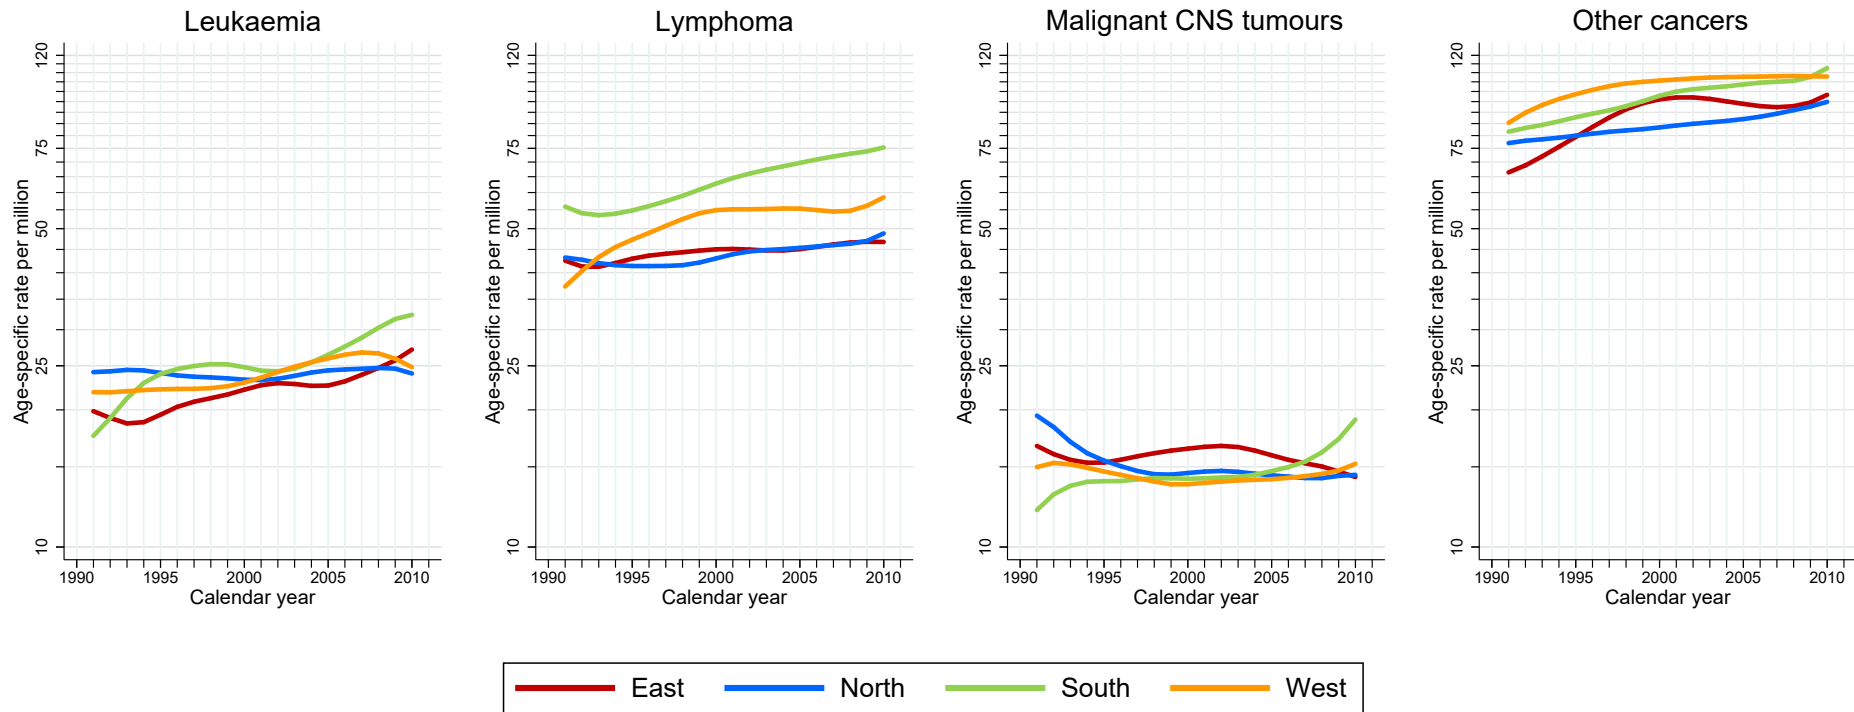

## Changing geographical patterns and trends in cancer incidence in children and adolescents in Europe, 1991-2010 (Automated Childhood Cancer Information System): a population-based study

**Figure S-3. Schematic presentation of changes in cancer incidence trends in children (age 0-14 years) and adolescents (age 15-19 years) by region of Europe for the total period 1991-2010 (Overall) and for the constituent time segments with significantly different trends if detected in the joinpoint analysis (Segments).**

↑significant increase; ↓significant decrease; → stable (non-significant) trend. Where no segments are shown, no joinpoints were detected.

|                        | All cancers |          | Leukaemia |          | Lymphoma |          | Malignant CNS tumours |          | Other cancers |          |
|------------------------|-------------|----------|-----------|----------|----------|----------|-----------------------|----------|---------------|----------|
|                        | Overall     | Segments | Overall   | Segments | Overall  | Segments | Overall               | Segments | Overall       | Segments |
| <b>Age 0-14 years</b>  |             |          |           |          |          |          |                       |          |               |          |
| East                   | ↑           | →→       | ↑         |          | ↓        |          | →                     |          | ↑             |          |
| North                  | ↑           |          | ↑         | ↑→       | →        |          | →                     |          | →             |          |
| South                  | ↑           |          | ↑         |          | →        |          | →                     |          | ↑             |          |
| West                   | ↑           |          | ↑         |          | ↑        |          | ↑                     |          | ↑             | ↑→       |
| Europe                 | ↑           |          | ↑         |          | →        |          | ↑                     |          | ↑             | ↑→→      |
| <b>Age 15-19 years</b> |             |          |           |          |          |          |                       |          |               |          |
| East                   | ↑           | →↑↓→     | ↑         |          | ↑        | →→→↑     | →                     |          | ↑             | ↑↓→      |
| North                  | ↑           | →→↑      | →         |          | ↑        |          | →                     |          | ↑             |          |
| South                  | ↑           |          | ↑         |          | ↑        |          | →                     |          | ↑             |          |
| West                   | ↑           | ↑↑       | ↑         |          | ↑        | ↑→→      | →                     |          | ↑             | ↑→       |
| Europe                 | ↑           | ↑→→      | ↑         |          | ↑        |          | →                     |          | ↑             | ↑→→      |
